# Supplementary material for: Effect of Lactobacillus plantarum TWK10 on Exercise Physiological Adaptation, Performance, and Body Composition in Healthy Humans
Source: MDPI journal article supplement (doi:10.3390/nu11112836), 2019-11-19
Supplement: s1 [file s1]

## Supplementary figures

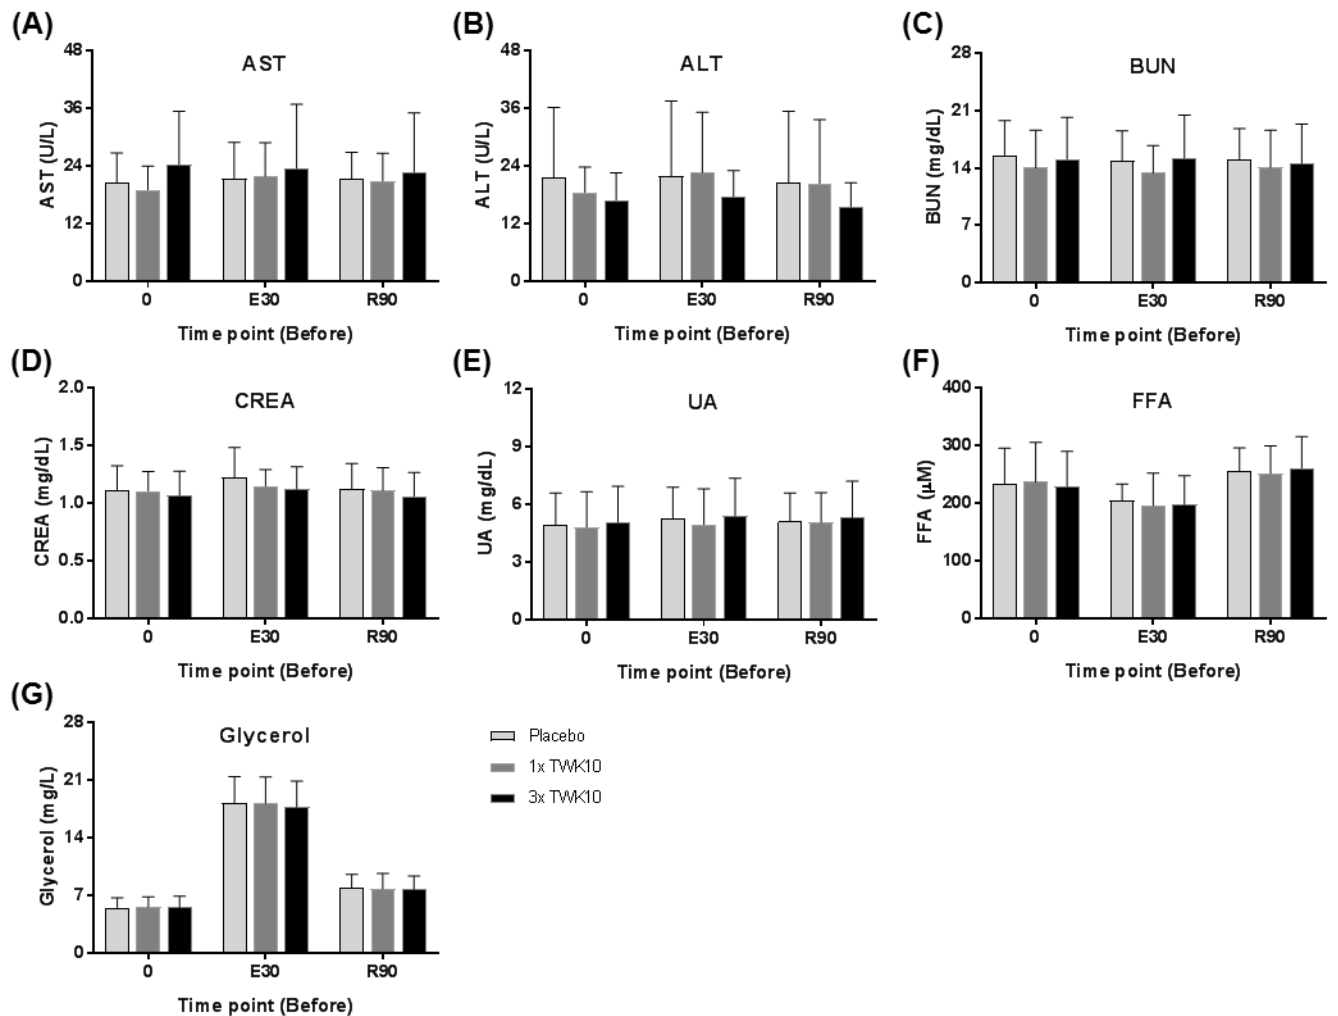

**Figure S1.** Blood biochemical profiles in the different time points of the subjects before the administration of TWK10: (A) AST; (B) ALT; (C) BUN; (D) Creatinine; (E) UA; (F) Free fatty acids; (G) Glycerol. 0, time zero; E30, exercise for 30 min; R90, resting 90 min after exercise. Statistical difference among groups was analyzed by Tukey–Kramer test at the same time point.

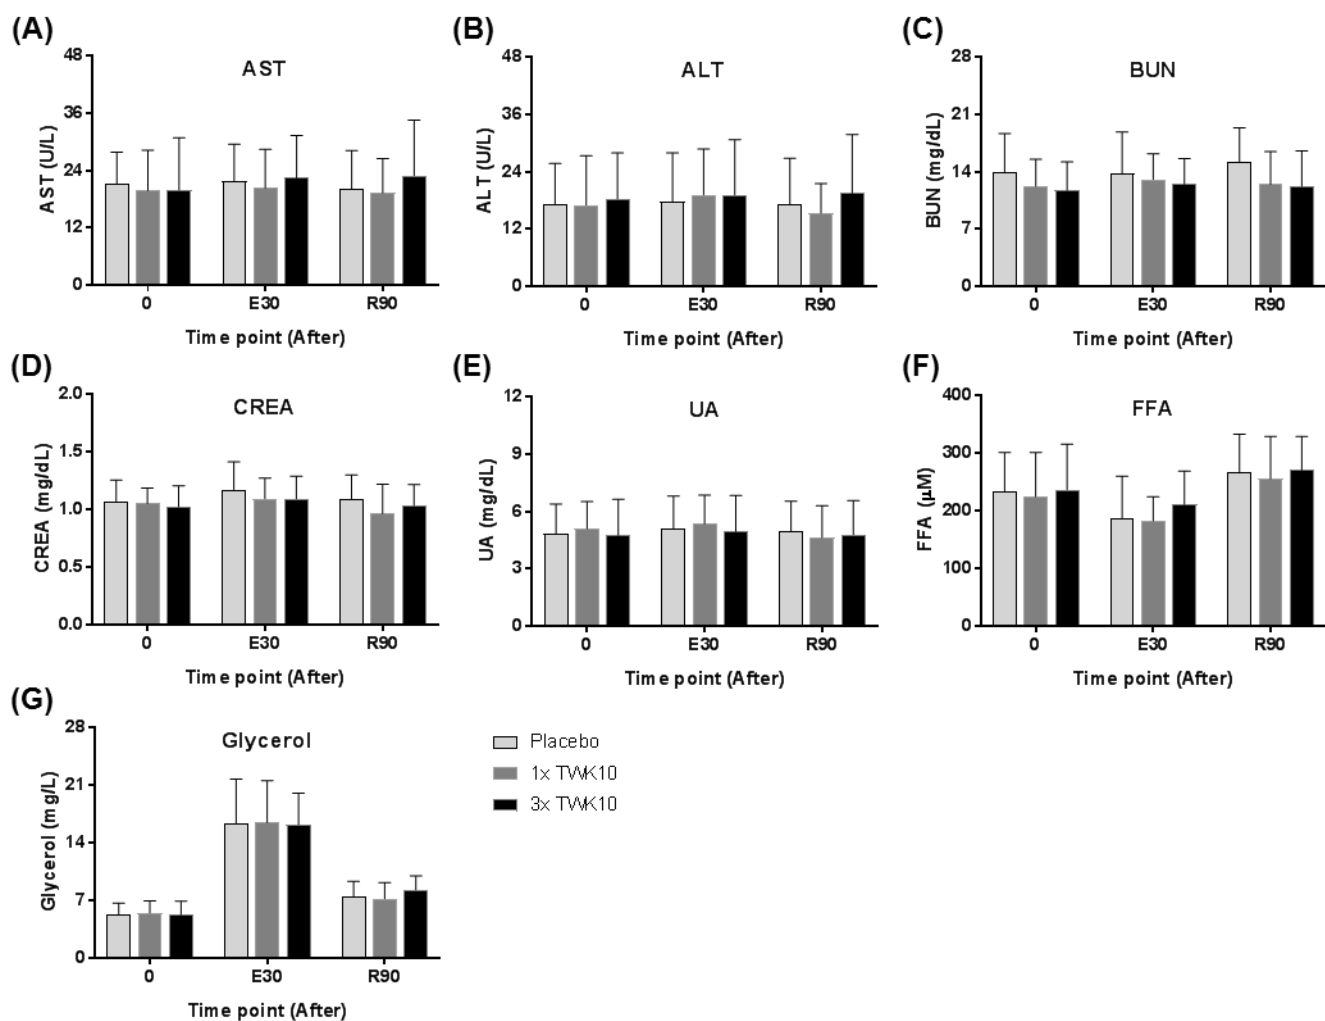

**Figure S2.** Blood biochemical profiles in the different time points of the subjects after the administration of TWK10: **(A)** AST; **(B)** ALT; **(C)** BUN; **(D)** Creatinine; **(E)** UA; **(F)** Free fatty acids; **(G)** Glycerol. 0, time zero; E30, exercise for 30 min; R90, resting 90 min after exercise. Statistical difference among groups was analyzed by Tukey–Kramer test at the same time point.
